# Supplementary material for: Constructing a p–n heterojunction between Bi 2 WO 6 and Co 3 O 4 for enhanced photothermocatalytic degradation of toluene
Source: Royal Society of Chemistry journal article supplement (doi:10.1039/d5nj04296h), 2025-12-23
Supplement: d5nj04296h1.pdf [file d5nj04296h1.pdf]

**Constructing a *p-n* heterojunction between Bi<sub>2</sub>WO<sub>6</sub> and Co<sub>3</sub>O<sub>4</sub> for  
enhanced photothermocatalytic of toluene degradation**

Qi Xue,<sup>ab</sup> Yangjie Qiao,<sup>a</sup> Bo Li,<sup>a</sup> Pengpeng Du,<sup>c</sup> Qiufang Liu,<sup>c</sup> YanYan,<sup>c</sup> Ruiyu Li,<sup>d</sup>

Yuan Dang,<sup>ab</sup> Yuanzhen Zhou<sup>\*ab</sup>

<sup>a</sup> *School of Chemistry and Chemical Engineering, Xi'an University of Architecture and Technology, Xi'an, 710055, China.*

<sup>b</sup> *Engineering Research Center of Low-Carbon Energy Efficient Utilization, Universities of Shaanxi Province, Xi'an University of Architecture and Technology, Xi'an, 710055, China*

<sup>c</sup> *Shaanxi Coal Chemical Industry Technology Research Institute Co. Ltd, Xi'an, 710100, China*

<sup>d</sup> *School of Science, Xi'an University of Architecture and Technology, Xi'an, 710055, China*

*\* Corresponding authors.*

*E-mail address: zhouyuanzhen@xauat.edu.cn (Y.Z. Zhou).*

## Experimental

### *Materials*

Cobalt Acetate ( $\text{Co}(\text{CH}_3\text{COO})_2 \cdot 4\text{H}_2\text{O}$ ), cetyltrimethylammonium bromide (CTAB), Sodium tungstate dihydrate ( $\text{Na}_2\text{WO}_4 \cdot 2\text{H}_2\text{O}$ ) and Bismuth nitrate pentahydrate ( $\text{Bi}(\text{NO}_3)_3 \cdot 5\text{H}_2\text{O}$ ) was bought from Shanghai Shanpu Chemical Co., Ltd. Urea, glycol, deionized (DI) water, Anhydrous ethanol was bought from Guangzhou Keqi Chemical Technology Co., Ltd.

### *Synthesis of the Catalysts*

Synthesis of  $\text{Co}_3\text{O}_4$  precursors: the  $\text{Co}_3\text{O}_4$  precursors were synthesized through a solvothermal method. Specifically, 15 mmol of  $\text{Co}(\text{CH}_3\text{COO})_2 \cdot 4\text{H}_2\text{O}$  were dissolved in 70 mL of glycol and stirred for 30 min. Subsequently, 30 mL of urea was added to the above red mixture and stirred for 1 h. The resulting suspended solution was moved into a 100 mL reaction vessel to undergo solvothermal reaction at  $180^\circ\text{C}$  for 12 h. The obtained product was centrifuged, washed alternatively washed with water and ethanol four times, and dried at  $80^\circ\text{C}$  for 12 h.

Synthesis of  $\text{Bi}_2\text{WO}_6/\text{Co}_3\text{O}_4$  FHNs: 1 mmol  $\text{Co}_3\text{O}_4$  precursor prepared above was dissolved in 40 mL of water. Separately, dissolve 1 mmol of  $\text{Bi}(\text{NO}_3)_3 \cdot 5\text{H}_2\text{O}$ , 0.025 g of CTAB and 1 mmol of  $\text{Na}_2\text{WO}_4 \cdot 2\text{H}_2\text{O}$  were separately in 40 mL water and stirred for 1 h. Then, the two suspensions were thoroughly mixed and moved to 100 mL reaction vessel for a hydrothermal reaction at  $160^\circ\text{C}$  for 24 h. The obtained product was separated by centrifugation, washed four times using deionized water and ethanol, and dried at  $80^\circ\text{C}$  for 12 h. Finally, the composites were obtained by calcining the collected precipitates at

350°C for 2 h. The synthesized composite was denoted as Bi<sub>2</sub>WO<sub>6</sub>/Co<sub>3</sub>O<sub>4</sub> FHNs-2. Using the identical method, only changing the molar ratios of Bi(NO<sub>3</sub>)<sub>3</sub>·5H<sub>2</sub>O/Co<sub>3</sub>O<sub>4</sub> FHNs to 2:1 and 1:2, Bi<sub>2</sub>WO<sub>6</sub>/Co<sub>3</sub>O<sub>4</sub> FHNs-1 and Bi<sub>2</sub>WO<sub>6</sub>/Co<sub>3</sub>O<sub>4</sub> FHNs-3 were obtained, respectively. The pure Bi<sub>2</sub>WO<sub>6</sub> catalyst was obtained using the same process without Co<sub>3</sub>O<sub>4</sub> precursor.

#### *Catalysts characterization*

The crystal structure of samples was recorded by powder X-ray diffraction (XRD, Bruker D8 Advance) using Cu K $\alpha$  radiation and Fourier Transform Infrared spectroscopy (FT-IR-21 Shimadzu spectrometer). The morphology and structure of samples were taken with the scanning electron microscope (SEM, GeminiSEM 500) and transmission electron microscope (TEM, FEI Talos F200x), respectively. The nitrogen adsorption-desorption isotherms were obtained on a Micromeritics-ASAP 2460 Brunauer-Emmett-Teller (BET), the pore size distribution and average pore size were determined through the Barret-Joyner-Halender (BJH) method and the adsorbed nitrogen volume. The optical characteristics of samples was characterized by ultraviolet-visible spectroscopy (UV-vis DRS, Shimadzu UV-2600, Japan). Depending on the UV-vis DRS spectra, the Tauc's equation was utilized to calculate the band gaps:  $(\alpha h\nu) = A (h\nu - E_g)^{n/2}$ . Where,  $\alpha$ ,  $h$ ,  $\nu$ ,  $A$  and  $E_g$  denote the light absorption coefficient, planck constant, light frequency, constant and band gap energy, respectively. Furthermore, the value of  $n$  is determined by the properties of transitions in semiconductors. In the case of Bi<sub>2</sub>WO<sub>6</sub>, it is classified as an indirect gap semiconductor with  $n$  set to 1. while Co<sub>3</sub>O<sub>4</sub> is considered a direct gap semiconductor with  $n$  set to 4.

### *Photoelectrochemical testing*

The electrochemical measurements were carried out at CHI660D electrochemical workstation. The samples coated on conductive glass (FTO, 1\*1 cm) acted as working electrodes, while saturated calomel electrode (SCE) and Pt acted as reference and counter electrode, respectively. Typically, 20 mg of prepared catalysts were added to a mixed solution containing 200  $\mu\text{L}$  of water, 50  $\mu\text{L}$  of ethanol and 15  $\mu\text{L}$  5 wt% Nafion solution. Then, 20  $\mu\text{L}$  of the above mixture was dripped on the surface of the glassy carbon electrode, and then air-dried at room temperature to obtain a working electrode. The normal hydrogen electrode (NHE) potentials are determined using the following the equation:  $E_{(\text{NHE})} = E_{(\text{SCE})} + 0.24$ . The potential interval of the Mott-Schottky test was near the open circuit potential with a frequency of 1000 Hz, and 0.1 M  $\text{Na}_2\text{SO}_4$  solution acted as the electrolyte.

**Figure**

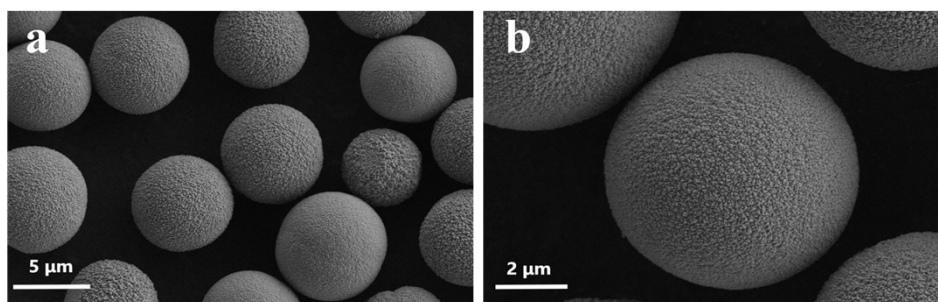

**Fig. S1.** SEM images of  $\text{Co}_3\text{O}_4$ .

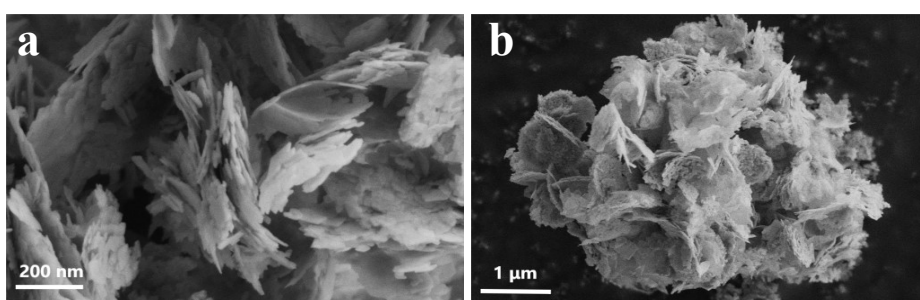

**Fig. S2.** SEM images of  $\text{Bi}_2\text{WO}_6$ .

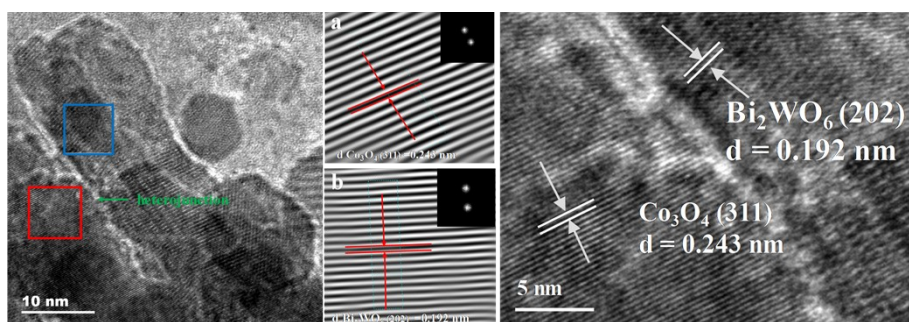

**Fig. S3.** HRTEM images of  $\text{Bi}_2\text{WO}_6/\text{Co}_3\text{O}_4$  FHNs and the right images of panels a and b are the fast Fourier transform (FFT) pattern of the area tagged by the red and blue square box.

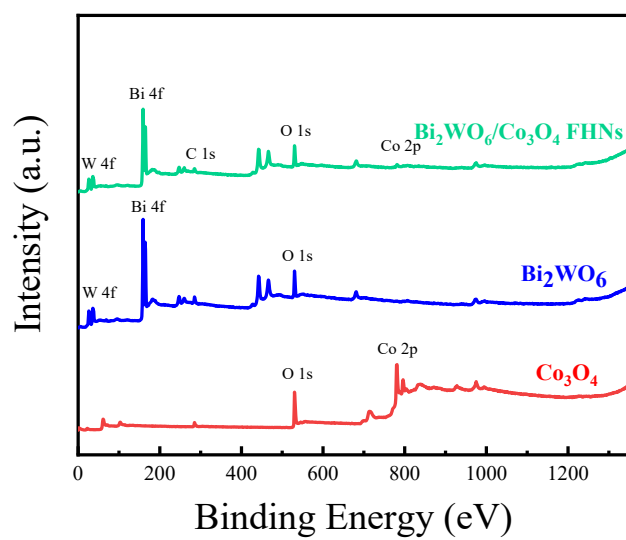

**Fig. S4.** XPS survey spectra of  $\text{Co}_3\text{O}_4$ ,  $\text{Bi}_2\text{WO}_6$  and  $\text{Bi}_2\text{WO}_6/\text{Co}_3\text{O}_4$  FHNs.

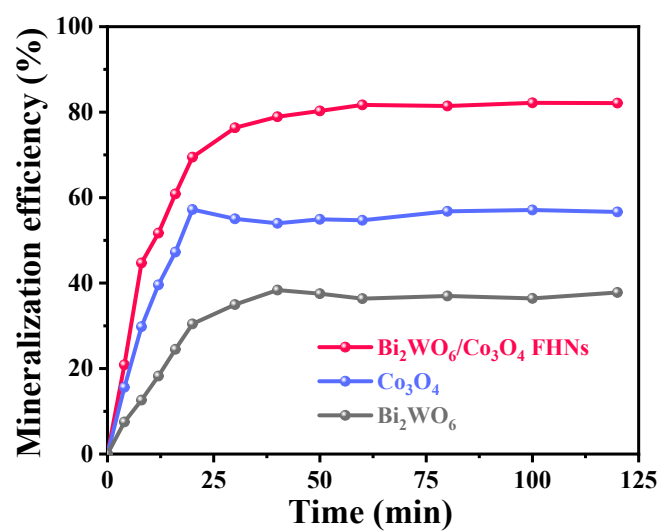

**Fig. S5.**  $\text{CO}_2$  mineralization efficiency

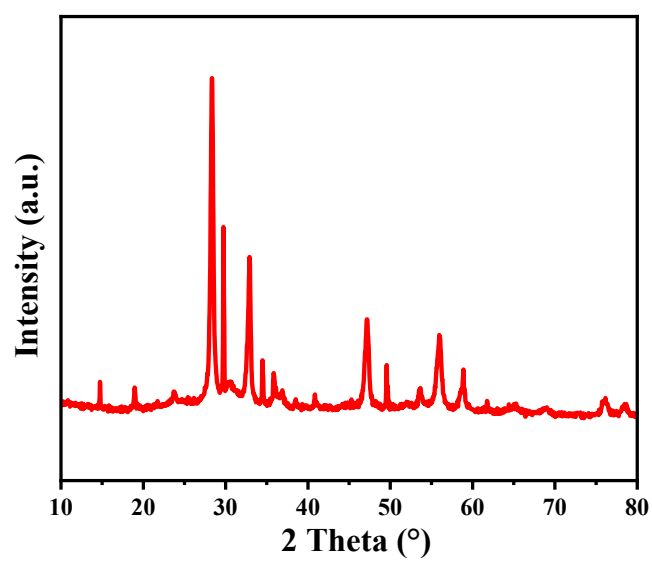

**Fig. S6.** XRD image of  $\text{Bi}_2\text{WO}_6/\text{Co}_3\text{O}_4$  FHNs after cyclic tests.

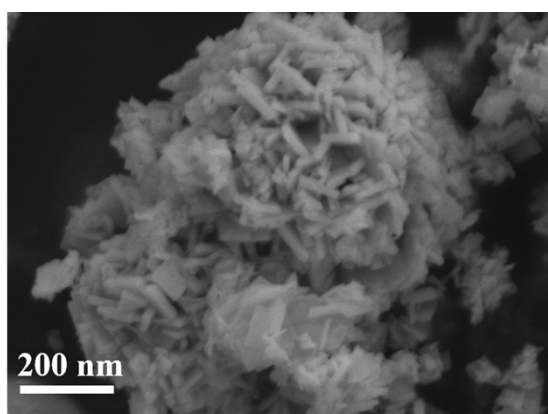

**Fig. S7.** SEM image of  $\text{Bi}_2\text{WO}_6/\text{Co}_3\text{O}_4$  FHNs after cyclic tests.
